# Supplementary material for: Development a m6A regulators characterized by the immune cell infiltration in stomach adenocarcinoma for predicting the prognosis and immunotherapy response
Source: publisher site journal article supplement (doi:10.18632/aging.204574), 2023-03-17
Supplement: Supplementary file [file aging-v15i6-204574-supplementary-material-SD1.pdf]

## SUPPLEMENTARY FIGURES

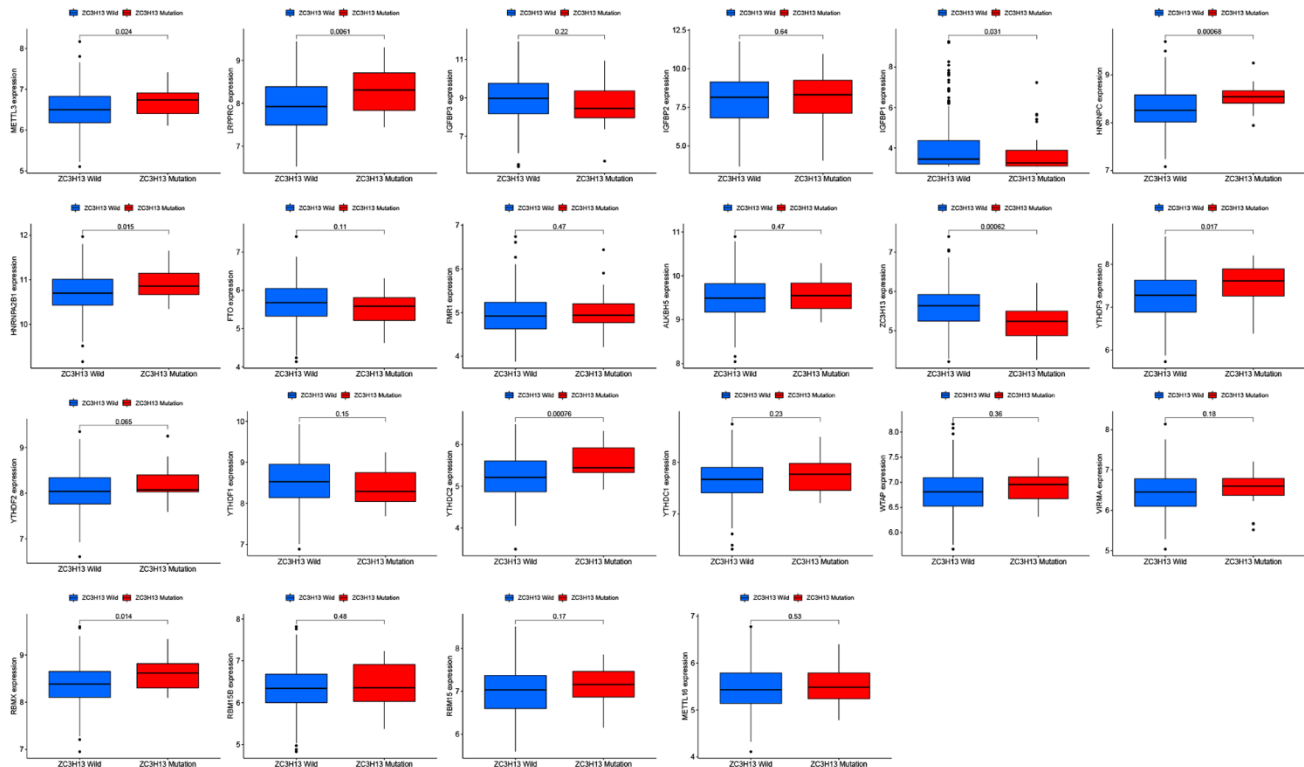

Supplementary Figure 1. Expression levels of 22 m<sup>6</sup>A regulators between ZC3H13 mutant and wild-type in TCGA database.

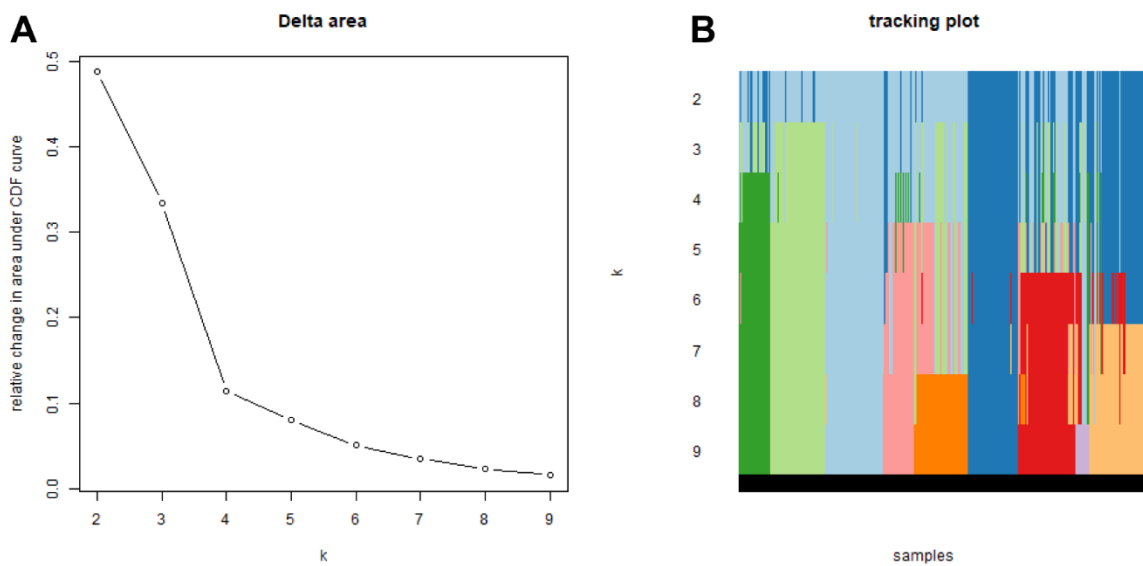

Supplementary Figure 2. Consensus clustering of 22 m<sup>6</sup>A regulators in the TCGA cohort. (A) relative change in area under the CDF in left panel; (B) The cumulative distribution function (CDF) for k=2 to 9 in right panel; relative change in area under the CDF in left panel.

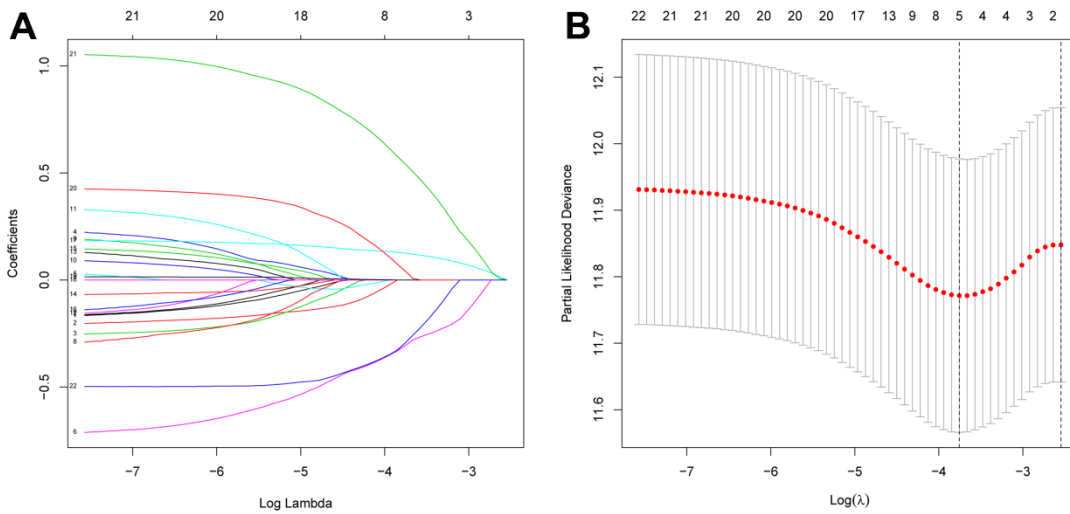

**Supplementary Figure 3. Five selection of genes by LASSO Cox regression.** (A) Selection of the optimal parameter (lambda) in the LASSO model for STAD. (B) LASSO coefficient profiles of the five genes in STAD. A coefficient profile plot was generated against the log (lambda) sequence.

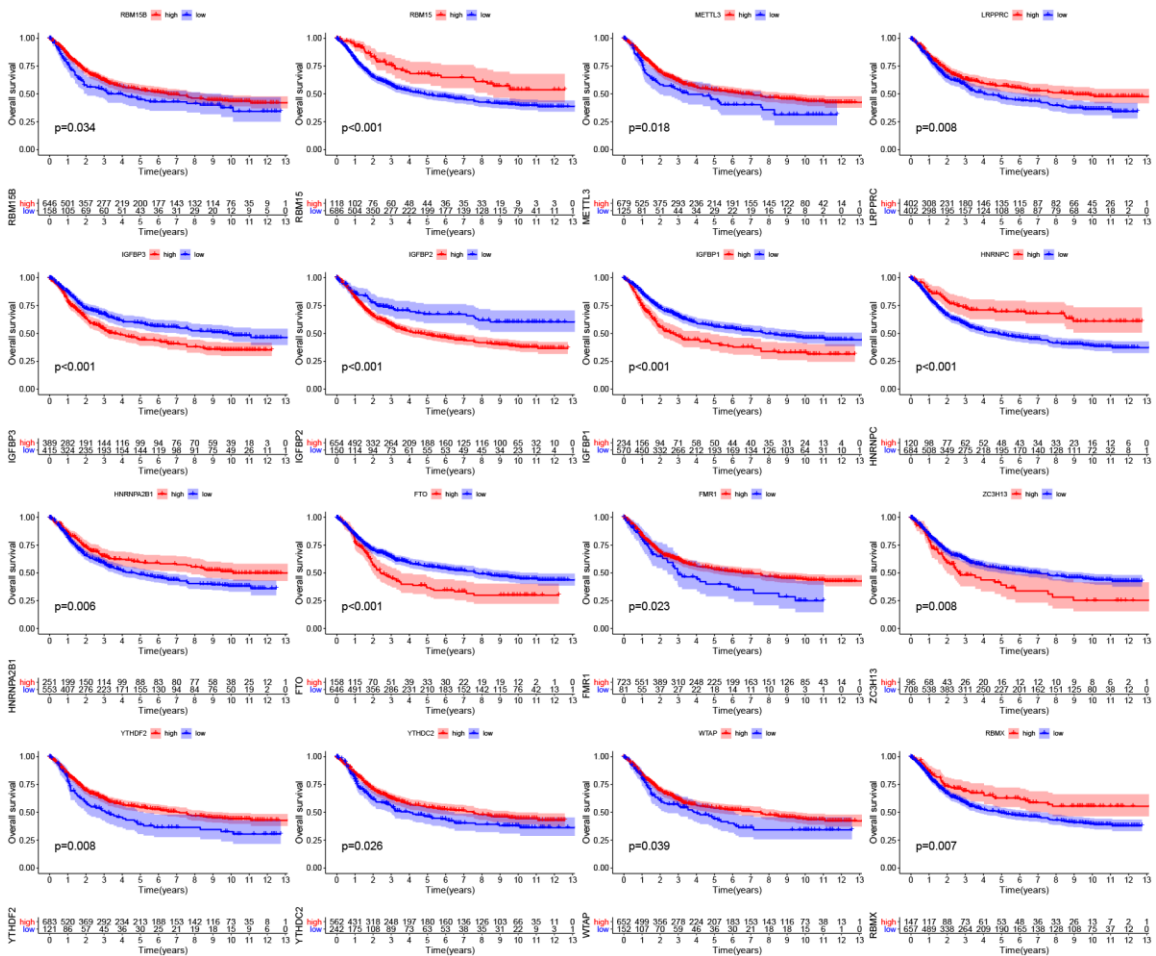

**Supplementary Figure 4. The prognostic subgroup analysis of m<sup>6</sup>A score based on the TCGA cohort.**

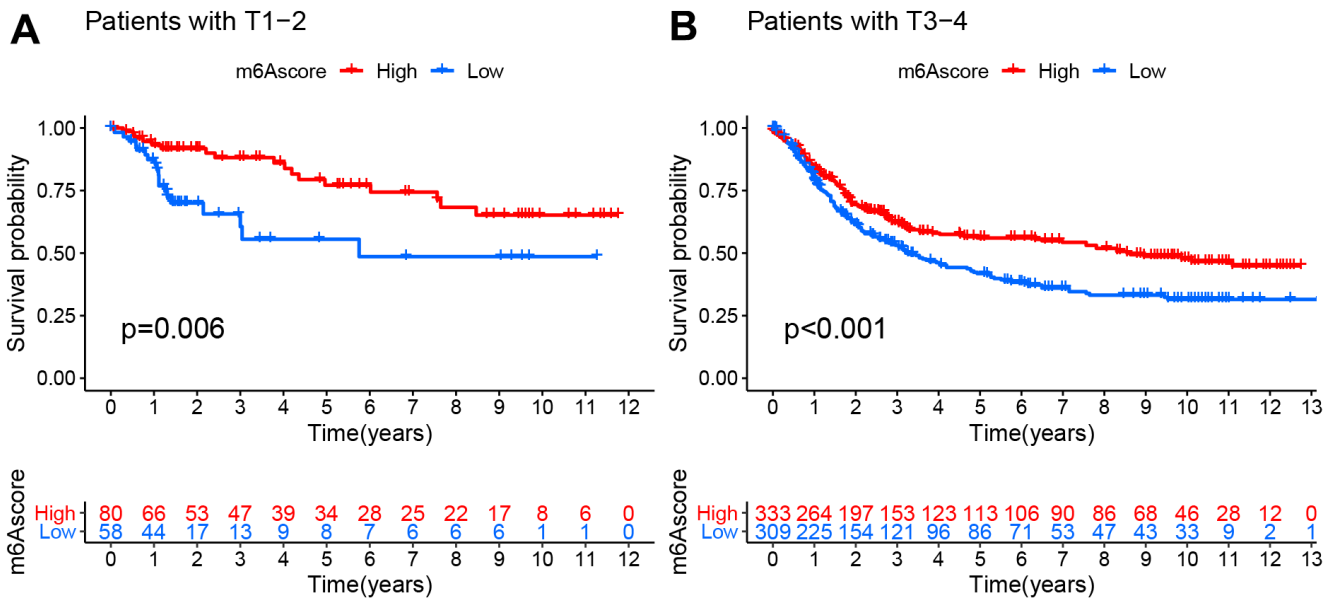

**Supplementary Figure 5. The prognostic clinical status analysis of m<sup>6</sup>A score based on the TCGA cohort. (A) K-M survival analysis in T1-2. (B) K-M survival analysis in T3-4.**

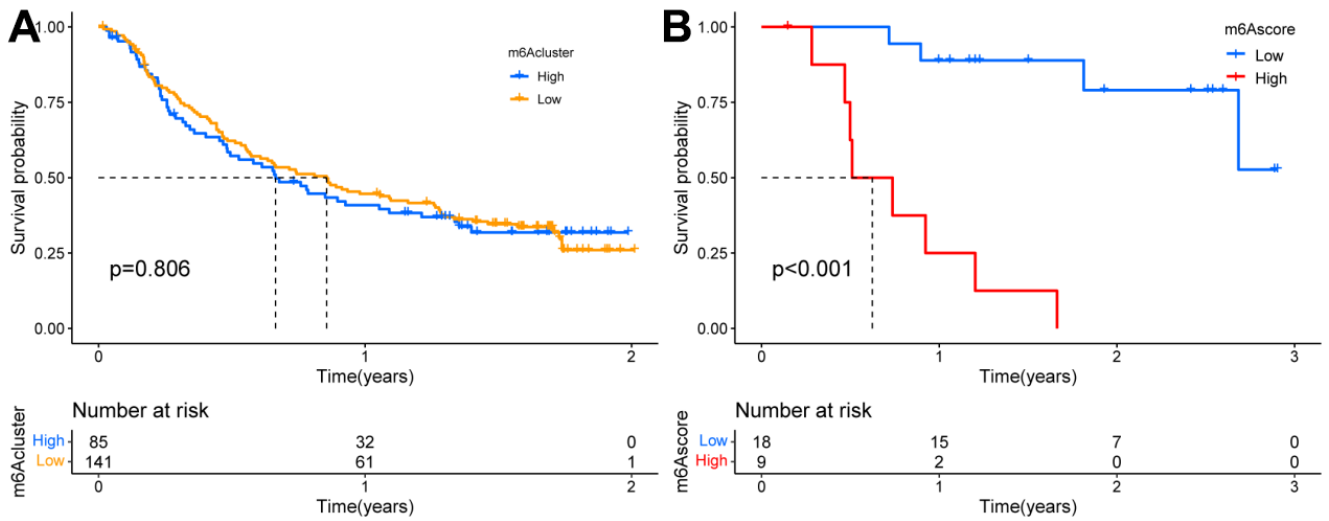

**Supplementary Figure 6. The prognostic clinical status analysis of m<sup>6</sup>A score between IMvigor210 and GSE78220 cohorts. (A) K-M survival analysis in high and low m6A cluster of IMvigor210. (B) K-M survival analysis in high and low m6A cluster of GSE78220.**
